# Supplementary material
Source: HighWire-hosted journal article supplement (https://learnmem.cshlp.org/content/suppl/2023/09/28/30.9.237)
Supplement: Supplemental_material.docx [file Supplemental_material.docx]

**Supplemental Material**

**Supplemental Table 1.** Recognition Memory Performance (mean (SD))

|  | **Hit Rate** | | **False Alarm Rate** | | **Corrected Recognition** | | **d Prime** | |
| --- | --- | --- | --- | --- | --- | --- | --- | --- |
| **Exp 1 Negative** | **Emotional** | **Neutral** | **Emotional** | **Neutral** | **Emotional** | **Neutral** | **Emotional** | **Neutral** |
| **YA** | 0.84 (0.05) | 0.80 (0.09) | 0.13 (0.06) | 0.14 (0.09) | 0.71 (0.09) | 0.67 (0.11) | 2.24 (0.51) | 2.20 (0.77) |
| **OA** | 0.86 (0.07) | 0.80 (0.15) | 0.18 (0.15) | 0.17 (0.17) | 0.68 (0.16) | 0.63 (0.22) | 2.33 (0.98) | 2.23 (1.21) |
| **Exp 2 Positive** |  |  |  |  |  |  |  |  |
| **YA** | 0.86 (0.11) | 0.75 (0.11) | 0.16 (0.21) | 0.11 (0.17) | 0.70 (0.22) | 0.64 (0.18) | 2.86 (1.19) | 2.39 (0.88) |
| **OA** | 0.78 (0.13) | 0.76 (0.13) | 0.13 (0.09) | 0.10 (0.07) | 0.65 (0.14) | 0.66 (0.13) | 2.09 (0.62) | 2.26 (0.78) |
| Note:YA = Younger Adult; OA = Older Adult; | | | | | | | | |

**Supplemental Figure 1.** Neutralmemory performance and change in reactivity and SO-SP coupling**.** Green circles denote Exp 1 (negative), and black triangles denote Exp 2 (positive). A) Correlation between coupling strength in N2 and corrected recognition in younger adults B) Correlation between coupling strength in SWS and corrected recognition in older adults C) Correlation coupling strength in N2 and change in valence in younger adultsD) Correlation between coupling strength in SWS and change in valence in older adults. * = p < 0.0125.

**Supplemental Figure 2.** d Prime and neutral d Prime and SO-SP coupling**.** Green circles denote Exp 1 (negative), and black triangles denote Exp 2 (positive). A) Correlation between coupling strength in N2 and d Prime in younger adults B) Correlation between coupling strength in SWS and d Prime in older adults C) Correlation coupling strength in N2 and neutral d Prime in younger adultsD) Correlation between coupling strength in SWS and neutral d Prime in older adults. * = p < 0.0125.
